# Supplementary material for: Evaluation of the Phosphoproteome of Mouse Alpha 4/Beta 2-Containing Nicotinic Acetylcholine Receptors In Vitro and In Vivo
Source: MDPI journal article supplement (doi:10.3390/proteomes6040042), 2018-10-15

### **Supplementary Legend**

Representative spectra for T417, S444, S448, S468, S470, S491, S521, S530, S540, S543 and S563. Red text highlights the b-ions and blue text highlights the y-ions.

## T417

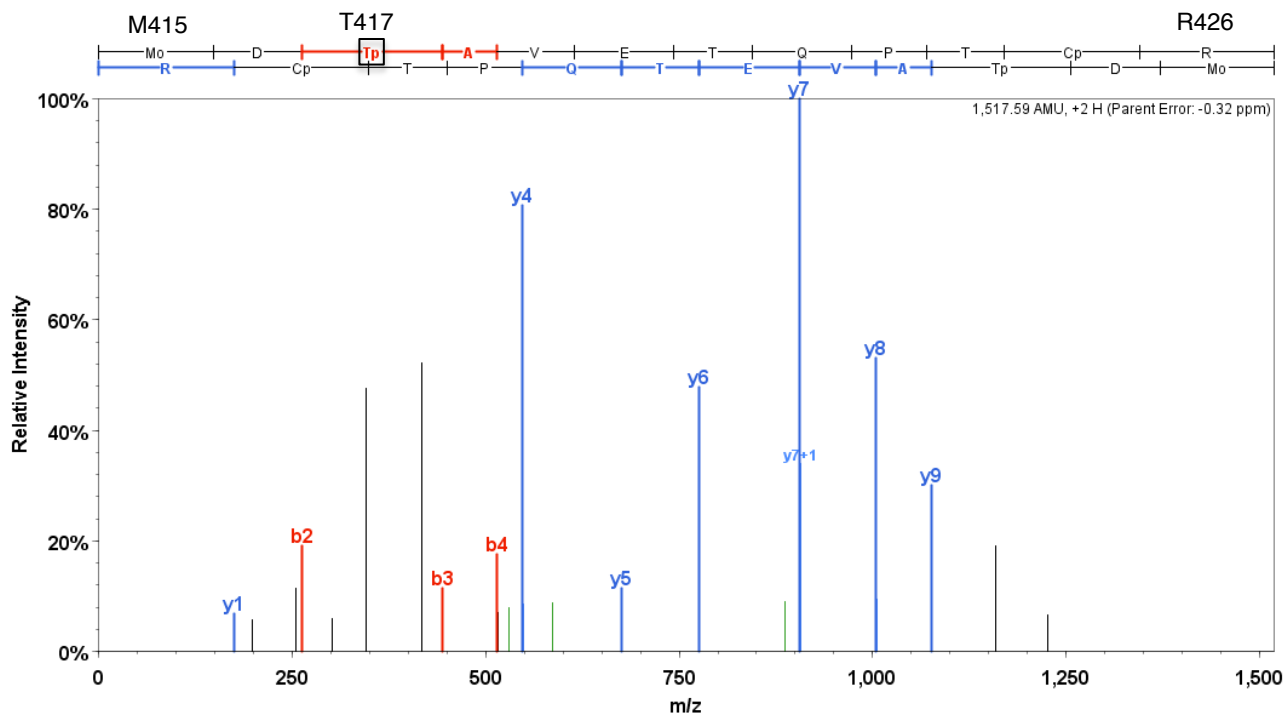

## S444 & S448

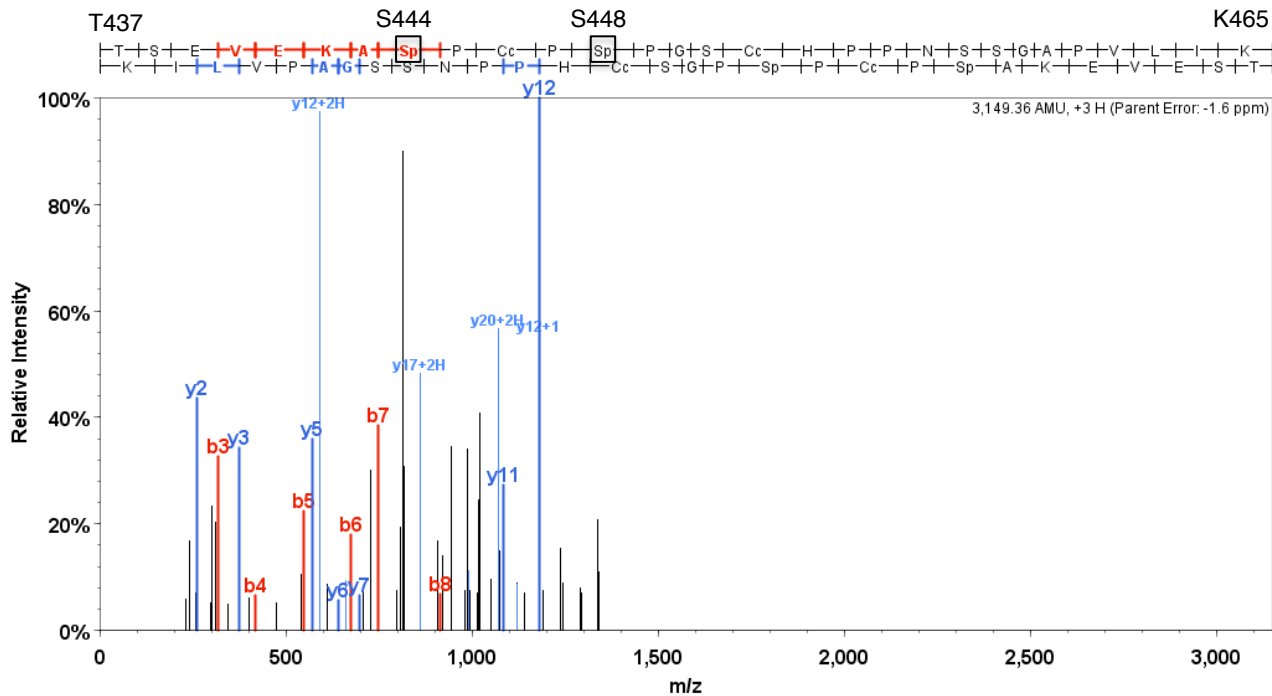

**S468**

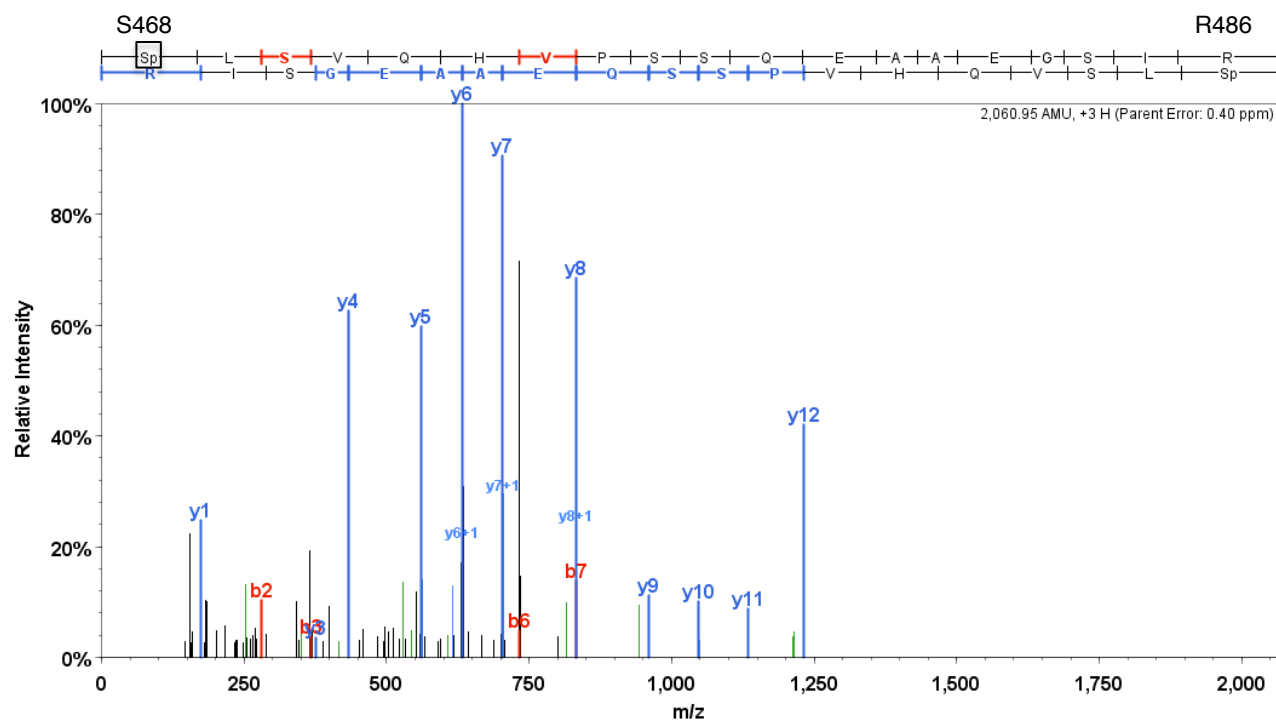

**S470**

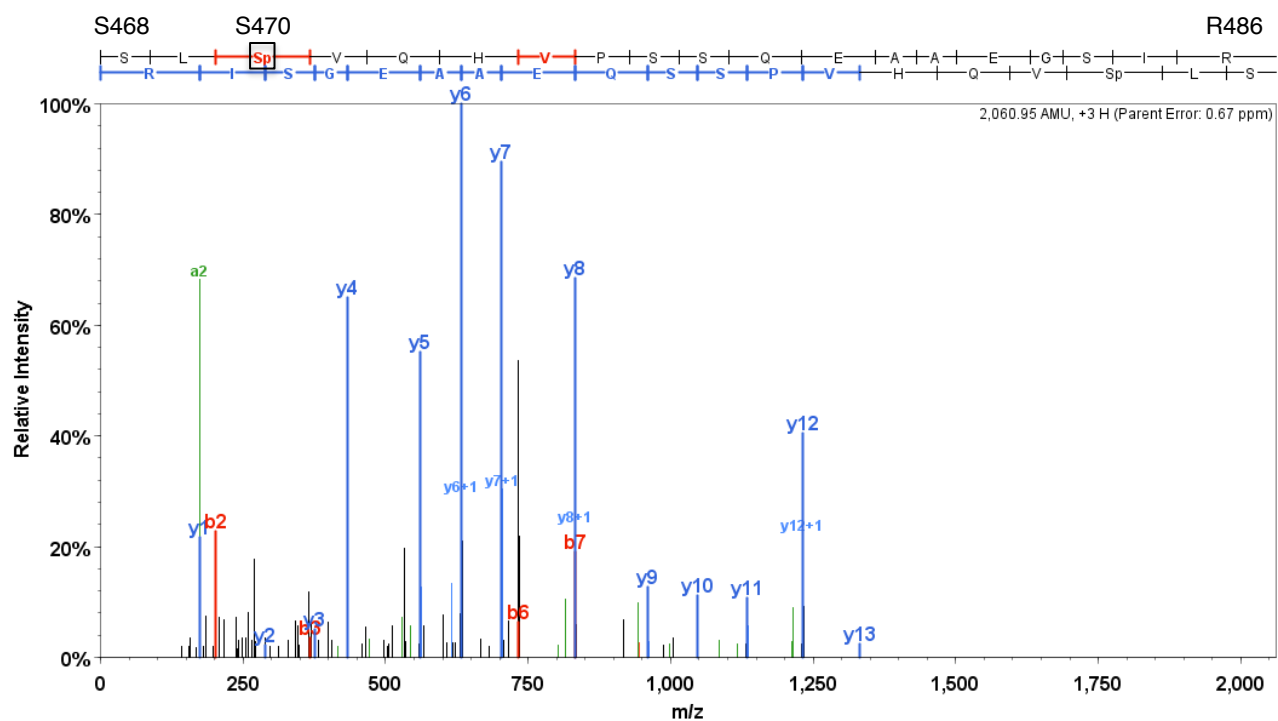

# S491

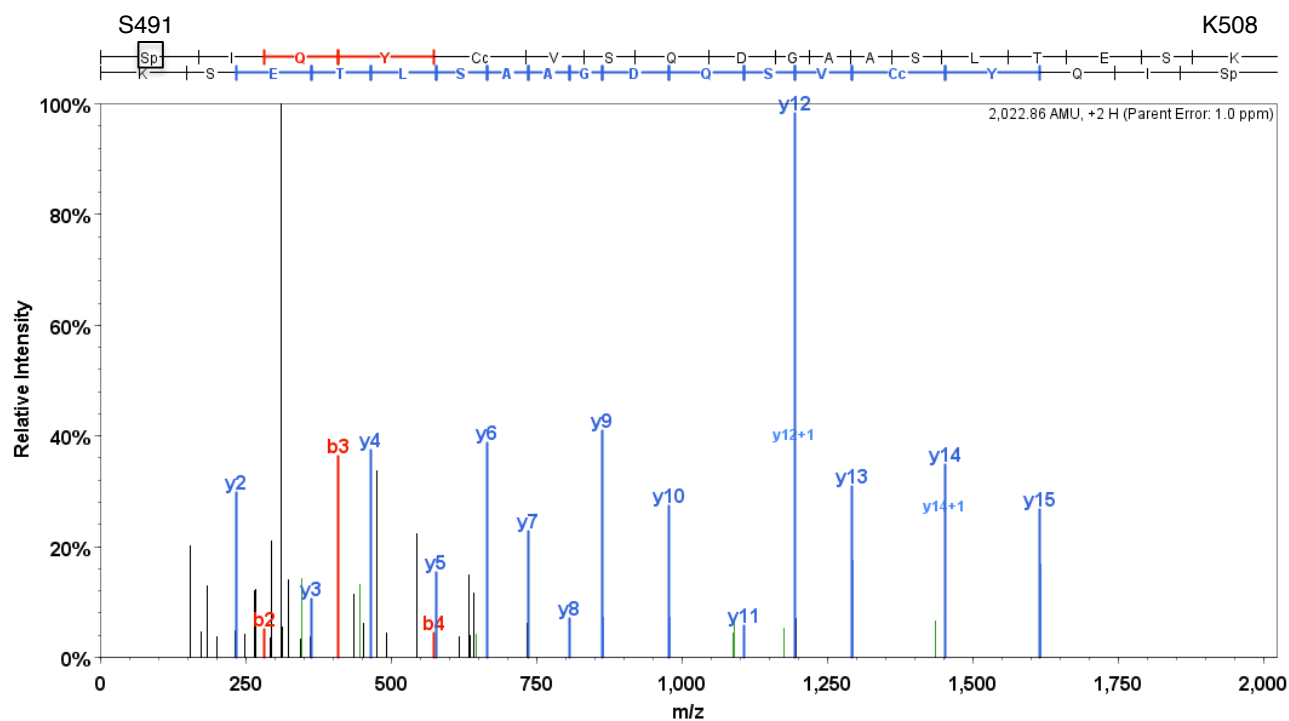

# S521

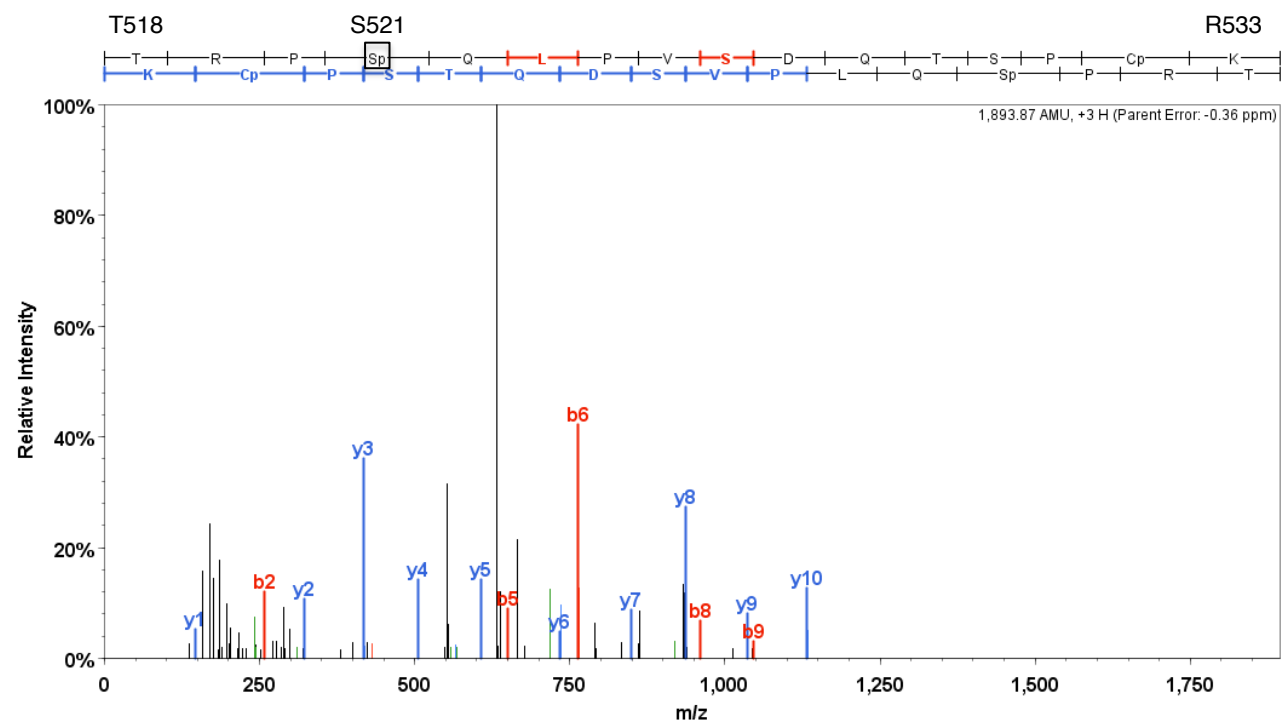

## S530

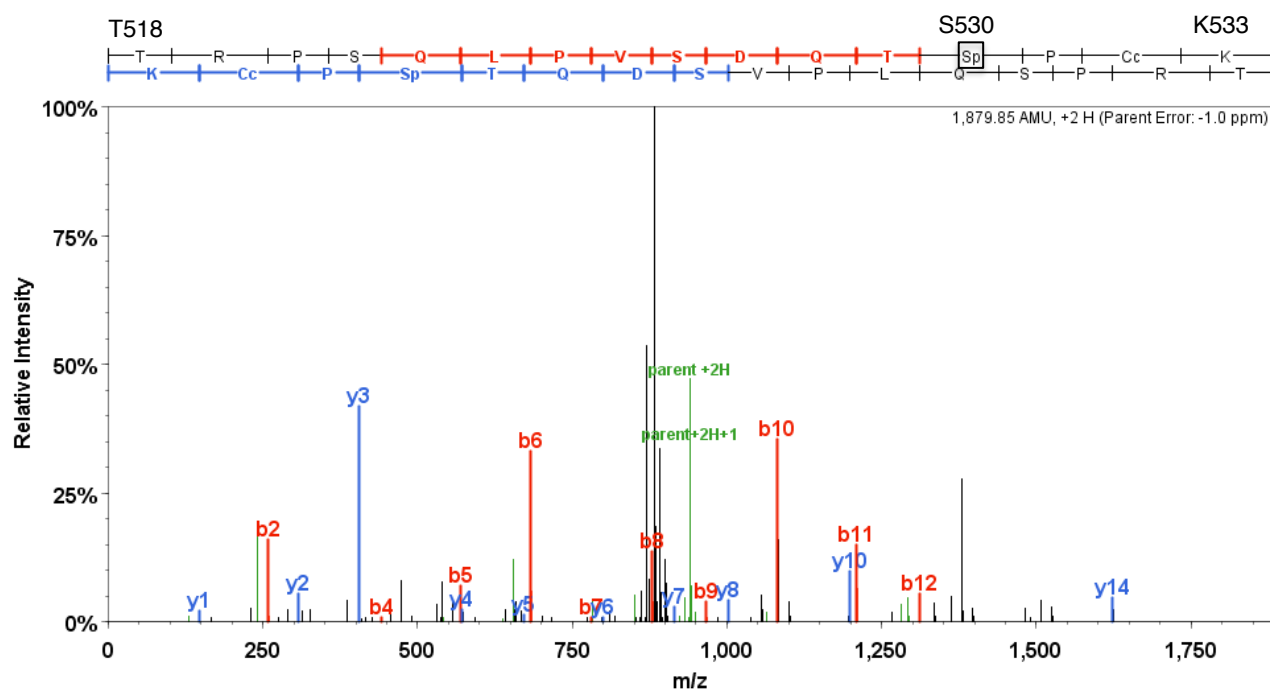

## S540

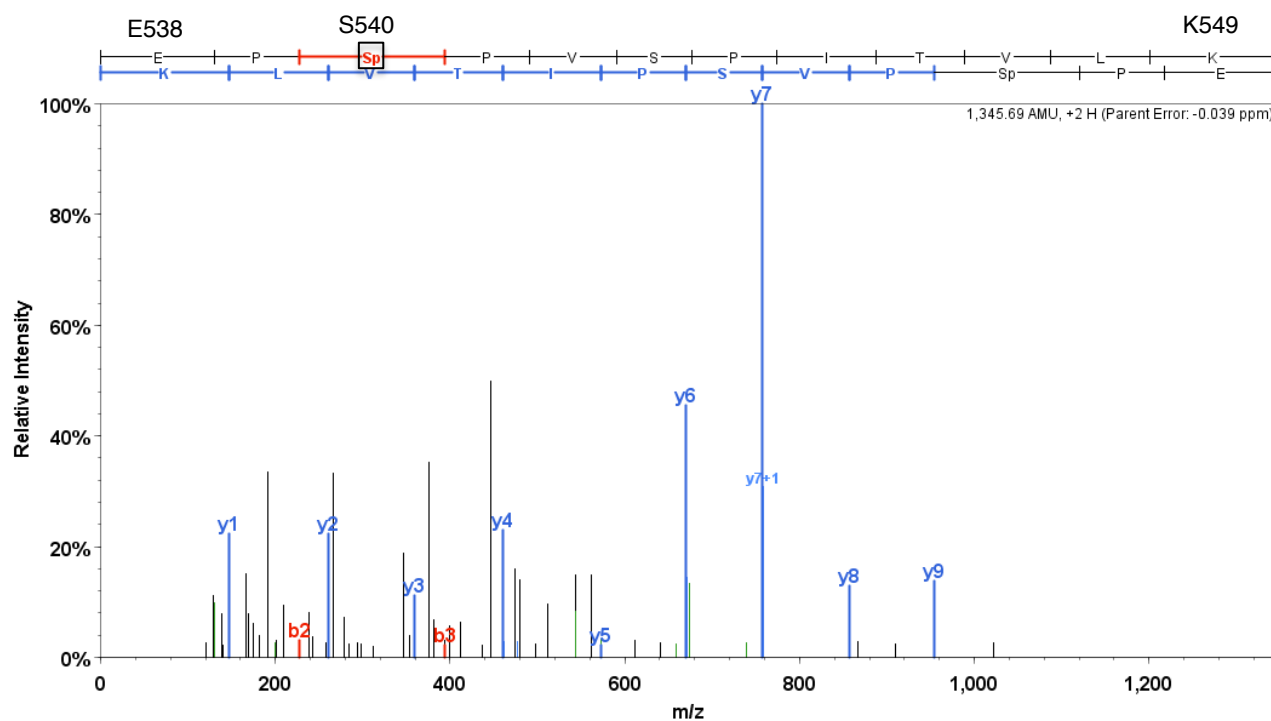

### S543

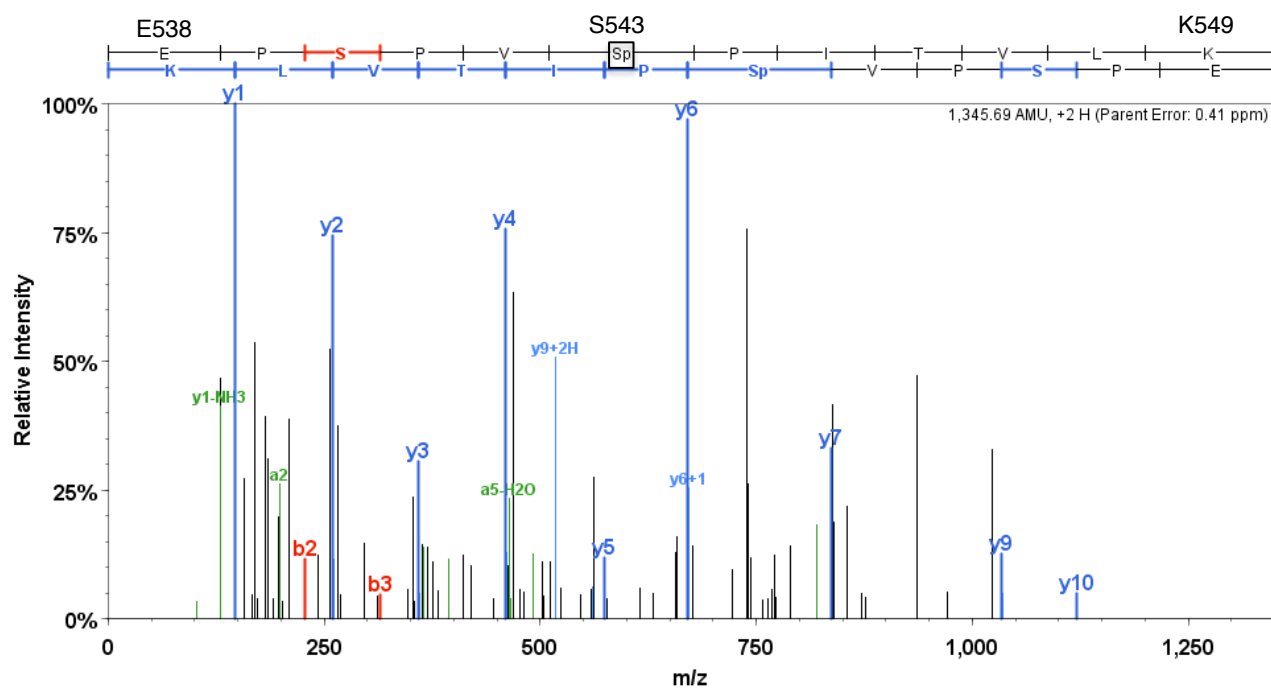

### S563

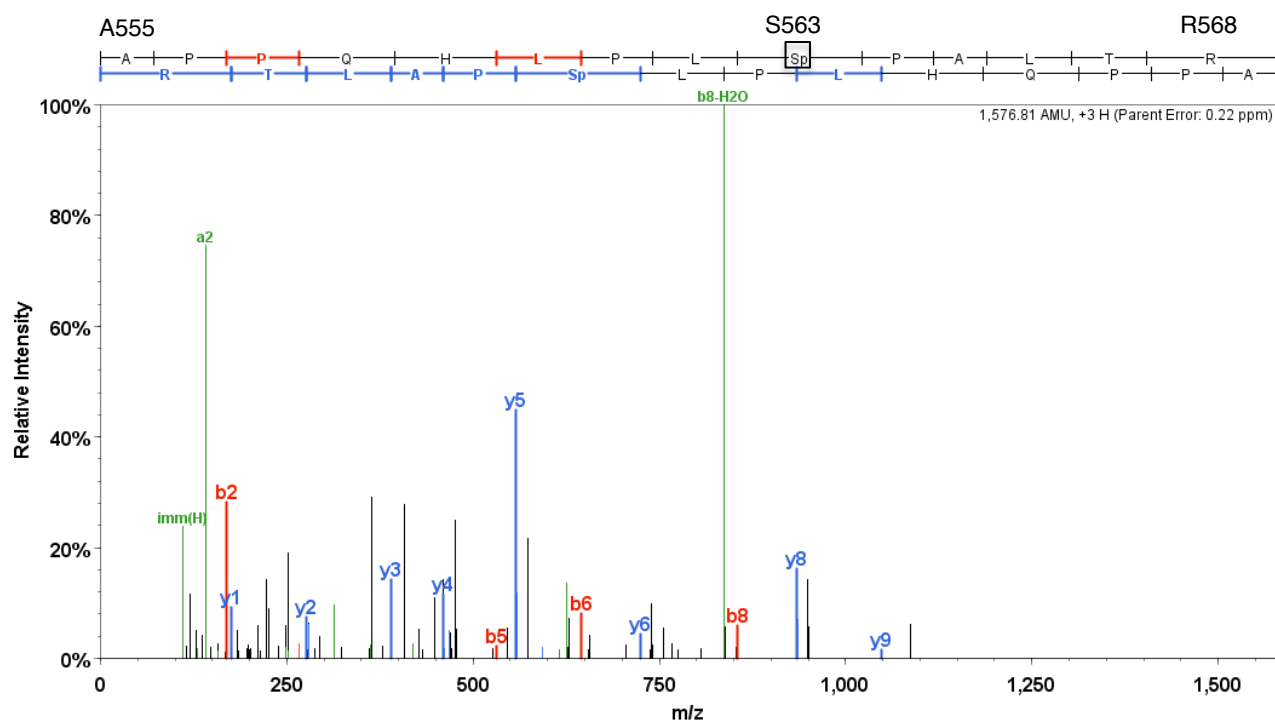

Supplement: s1 [file s1]
